# Supplementary material for: Highly crystalline and uniform conjugated polymer thin films by a water-based biphasic dip-coating technique minimizing the use of halogenated solvents for transistor applications
Source: Royal Society of Chemistry journal article supplement (doi:10.1039/c8ra09231a), 2019-01-01
Supplement: c8ra09231a1.pdf [file c8ra09231a1.pdf]

## Supporting Information for

# Highly Crystalline and Uniform Conjugated Polymer Thin Films by Water-Based Biphasic Dip-Coating Technique Minimizing the Use of Halogenated Solvent for Transistor Applications

Eun Hye Kwon,<sup>a</sup> Young Jin Jang,<sup>a</sup> Gun Woo Kim,<sup>b</sup> Min Kim\*<sup>c</sup> and Yeong Don Park\*<sup>a,b</sup>

Department of Energy and Chemical Engineering, Incheon National University, Incheon 22012, Korea

E-mail: [cylee@inu.ac.kr](mailto:cylee@inu.ac.kr); [ydpark@inu.ac.kr](mailto:ydpark@inu.ac.kr)

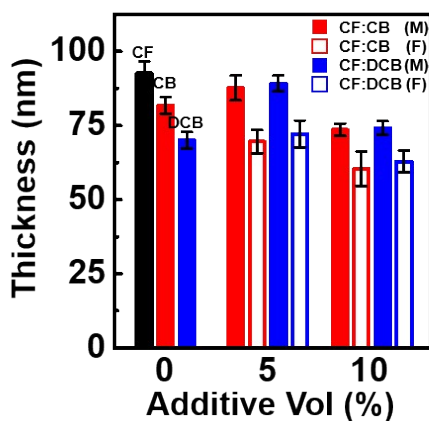

**Figure S1.** Thicknesses of the P3HT films dip-coated from the biphasic solvents with solvent additives CF:CB and CF:DCB for the two different solvent addition methods.

Table S1. Device parameters of the dip-coated P3HT FET devices. Each device parameter was average value calculated from the 10 devices.

|          |            | $\mu$ (cm <sup>2</sup> V <sup>-1</sup> s <sup>-1</sup> ) ( $\times 10^{-3}$ ) | On-off ratio ( $\times 10^3$ ) | $V_{th}$      |
|----------|------------|-------------------------------------------------------------------------------|--------------------------------|---------------|
| Pristine | CF         | $0.13 \pm 0.34$                                                               | $1.50 \pm 0.49$                | $9 \pm 4.11$  |
|          | CB         | $12.53 \pm 5.00$                                                              | $15.80 \pm 5.57$               | $24 \pm 1.00$ |
|          | DCB        | $25.20 \pm 16.00$                                                             | $76.60 \pm 7.69$               | $14 \pm 3.00$ |
| Floating | CF:CB(5)   | $17.94 \pm 6.20$                                                              | $17.90 \pm 6.30$               | $19 \pm 3.86$ |
|          | CF:CB(10)  | $24.66 \pm 9.08$                                                              | $26.80 \pm 3.24$               | $13 \pm 6.00$ |
|          | CF:DCB(5)  | $2.74 \pm 1.54$                                                               | $3.91 \pm 1.66$                | $30 \pm 6.03$ |
|          | CF:DCB(10) | $6.02 \pm 3.67$                                                               | $9.84 \pm 8.93$                | $21 \pm 8.62$ |
| Mixing   | CF:CB(5)   | $32.21 \pm 5.04$                                                              | $21.40 \pm 6.91$               | $19 \pm 5.51$ |
|          | CF:CB(10)  | $39.16 \pm 7.82$                                                              | $41.40 \pm 3.62$               | $10 \pm 2.38$ |
|          | CF:DCB(5)  | $6.18 \pm 2.21$                                                               | $2.27 \pm 2.81$                | $29 \pm 4.24$ |
|          | CF:DCB(10) | $9.52 \pm 3.73$                                                               | $3.04 \pm 2.96$                | $30 \pm 3.79$ |
